# Supplementary material for: Methods for Drainage of Distal Malignant Biliary Obstruction after ERCP Failure: A Systematic Review and Network Meta-Analysis
Source: MDPI journal article supplement (doi:10.3390/cancers14133291), 2022-07-05
Supplement: s1 [file s1]

# Methods for Drainage of Distal Malignant Biliary Obstruction after ERCP Failure: A Systematic Review and Network Meta-Analysis

Antonio Facciorusso <sup>1,2</sup>, Benedetto Mangiavillano <sup>3</sup>, Danilo Paduano <sup>3</sup>, Cecilia Binda <sup>4,\*</sup>, Stefano Francesco Crinò <sup>2</sup>, Paraskevas Gkolfakis <sup>5</sup>, Daryl Ramai <sup>6</sup>, Alessandro Fugazza <sup>7</sup>, Ilaria Tarantino <sup>8</sup>, Andrea Lisotti <sup>9</sup>, Pietro Fusaroli <sup>9</sup>, Carlo Fabbri <sup>4</sup> and Andrea Anderloni <sup>7</sup>

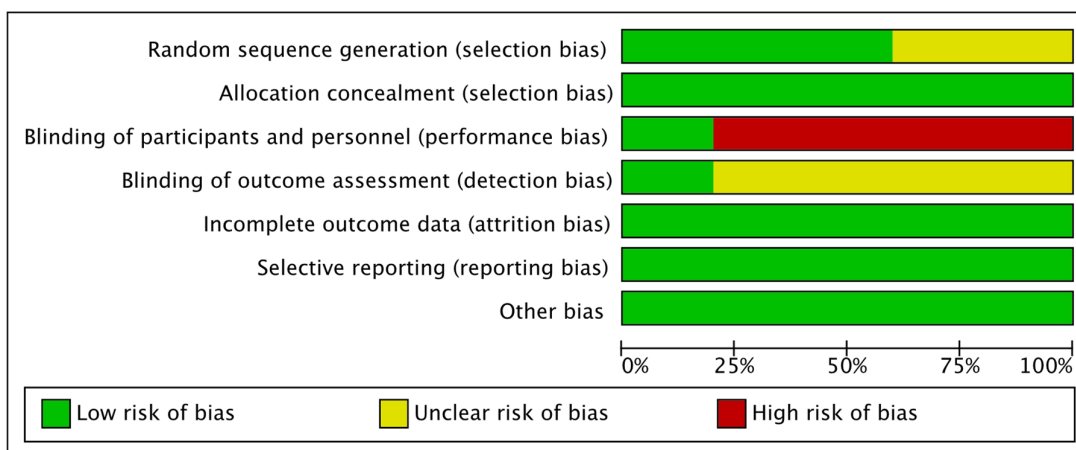

**Figure S1.** Risk of bias graph of the included trials.

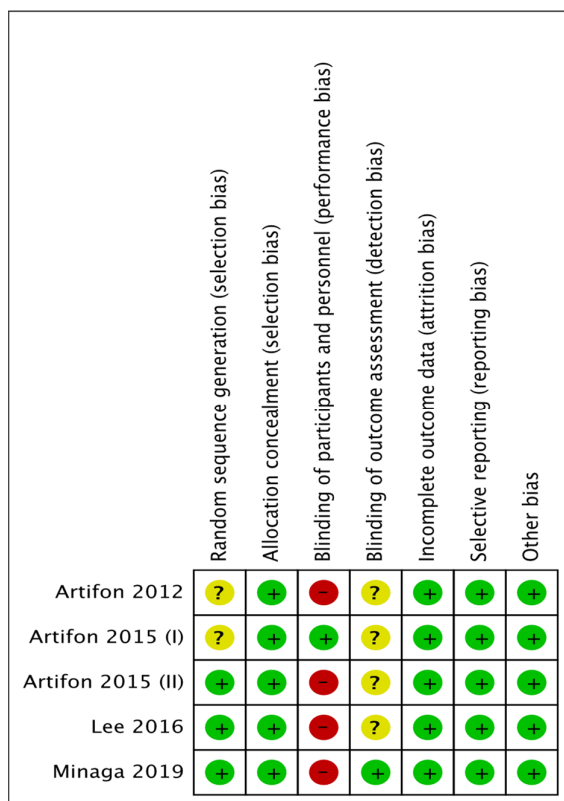

**Figure S2.** Risk of bias summary of the included trials.

**Table S1.** Results of network meta-analysis concerning technical success rate and moderate/severe adverse event rate.

|                                | Technical success rate |                     | Moderate-Severe adverse event rate |                     |
|--------------------------------|------------------------|---------------------|------------------------------------|---------------------|
|                                | Risk Ratio (95% CI)    | Quality of Evidence | Risk Ratio (95% CI)                | Quality of Evidence |
| <b>All treatments vs. PTBD</b> |                        |                     |                                    |                     |
| EUS-CD                         | 1.02 (0.96-1.08)       | Low                 | 0.45 (0.21-2.03)                   | Low                 |
| EUS-HG                         | 1.03 (0.97-1.09)       | Low                 | 0.35 (0.18-1.47)                   | Low                 |
| Surgery                        | 1.09 (0.87-1.38)       | Low                 | 0.50 (0.10-3.52)                   | Low                 |
| <b>vs. EUS-CD</b>              |                        |                     |                                    |                     |
| EUS-HG                         | 1.01 (0.93-1.09)       | Low                 | 0.54 (0.26-1.88)                   | Low                 |
| Surgery                        | 1.07 (0.85-1.34)       | Low                 | 1.26 (0.22-3.91)                   | Low                 |
| <b>vs. EUS-HG</b>              |                        |                     |                                    |                     |
| Surgery                        | 1.06 (0.83-1.34)       | Low                 | 1.75 (0.16-5.03)                   | Low                 |

Abbreviations: EUS-CD, Endoscopic ultrasound choledochoduodenostomy; EUS-HG, Endoscopic ultrasound hepatico-gastrostomy; PTBD, Percutaneous trans-hepatic biliary drainage.

**Table S2.** SUCRA ranking of treatments for technical success rate and moderate/severe adverse event rate.

| Technical success rate |      | Moderate-severe adverse event rate |      |
|------------------------|------|------------------------------------|------|
| Surgery                | 0.54 | EUS-HG                             | 0.62 |
| EUS-HG                 | 0.47 | EUS-CD                             | 0.51 |
| EUS-CD                 | 0.36 | Surgery                            | 0.48 |
| PTBD                   | 0.31 | PTBD                               | 0.18 |

Abbreviations: EUS-CD, Endoscopic ultrasound choledochoduodenostomy; EUS-HG, Endoscopic ultrasound hepatico-gastrostomy; PTBD, Percutaneous trans-hepatic biliary drainage.

**Table S3.** Pooled incidence of different adverse events in the included trials.

| Adverse Event      | EUS-CD       |              |              |             |                   |                | PTBD         |          |                   | Surgical hepato-jejunostomy |               | EUS-HG      |                   |                |
|--------------------|--------------|--------------|--------------|-------------|-------------------|----------------|--------------|----------|-------------------|-----------------------------|---------------|-------------|-------------------|----------------|
|                    | Artifon 2012 | Artifon 2015 | Lee 2016 (I) | Minaga 2019 | Artifon 2015 (II) | Overall        | Artifon 2012 | Lee 2016 | Overall           | Artifon 2015                | Lee 2016 (II) | Minaga 2019 | Artifon 2015 (II) | Overall        |
| Bleeding           | 0 (0%)       | 1 (6.2%)     | 0 (0%)       | 0 (0%)      | 1 (4.1%)          | 3.4% (0%-7.3%) | 1 (8.3%)     | 3 (9.3%) | 9.1% (0.6%-17.6%) | 1 (6.2%)                    | 0 (0%)        | 0 (0%)      | 3 (12%)           | 2.9% (0%-6.9%) |
| Perforation        | 0 (0%)       | 0 (0%)       | 0 (0%)       | 0 (0%)      | 1 (4.1%)          | 3.1% (0%-6.7%) | 0 (0%)       | 0 (0%)   | 0%                | 0 (0%)                      | 0 (0%)        | 0 (0%)      | 0 (0%)            | 0%             |
| Stent migration    | 0 (0%)       | 1 (6.2%)     | 0 (0%)       | 0 (0%)      | 0 (0%)            | 2.8% (0%-6.2%) | 0 (0%)       | 0 (0%)   | 0%                | 0 (0%)                      | 0 (0%)        | 1 (4.1%)    | 0 (0%)            | 2.4% (0%-5.8%) |
| Acute pancreatitis | 0 (0%)       | 0 (0%)       | 1 (12.5%)    | 1 (4.3%)    | 0 (0%)            | 3.1% (0%-6.8%) | 0 (0%)       | 0 (0%)   | 0%                | 0 (0%)                      | 1 (4%)        | 0 (0%)      | 0 (0%)            | 2.4% (0%-5.8%) |
